# Supplementary material for: AXL inhibition improves BRAF-targeted treatment in melanoma
Source: Sci Rep. 2022 Mar 24;12:5076. doi: 10.1038/s41598-022-09078-z (PMC8948193; doi:10.1038/s41598-022-09078-z)
Supplement: Supplementary file 1 — Supplementary Information. [file 41598_2022_9078_MOESM1_ESM.pdf]

## **“AXL Inhibition Improves BRAF-Targeted Treatment in Melanoma”**

Marta Nyakas<sup>a,b,c</sup>, Karianne Giller Fleten<sup>a</sup>, Mads Haugland Haugen<sup>a</sup>, Nikolai Engedal<sup>a</sup>, Christina Sveen<sup>a</sup>, Inger Nina Farstad<sup>c,d</sup>, Vivi Ann Flørenes<sup>e</sup>, Lina Prasmickaite<sup>a\*</sup>, Gunhild Mari Mælandsmo<sup>a,f\*</sup> and Kotryna Seip<sup>a\*</sup>

\* The authors contributed equally.

<sup>a</sup> Department of Tumor Biology, Oslo University Hospital, the Norwegian Radium Hospital, Oslo, Norway;

<sup>b</sup> Department of Oncology, Oslo University Hospital, the Norwegian Radium Hospital, Oslo, Norway;

<sup>c</sup> Institute of Clinical Medicine, University of Oslo, Oslo, Norway;

<sup>d</sup> Department of Pathology, Division of Laboratory Medicine, Oslo University Hospital, Oslo, Norway;

<sup>e</sup> Department of Pathology, Oslo University Hospital, the Norwegian Radium Hospital, Oslo, Norway;

<sup>f</sup> Department of Medical Biology, Faculty of Health Sciences, UiT/the Arctic University of Norway, Tromsø, Norway.

# Supplementary Figure S1

Bliss independence in terms of Mortality

**24 hours, % of control**

| AXLi, $\mu$ M        |   | Melmet 1 | A375  |
|----------------------|---|----------|-------|
| BRAFi<br>0.1 $\mu$ M | 1 | 0.652    | 0.680 |
|                      | 2 | 1.259    | 0.903 |
|                      | 3 | 1.004    | 0.972 |
|                      |   |          |       |
| BRAFi<br>1 $\mu$ M   | 1 | 1.145    | 0.747 |
|                      | 2 | 0.860    | 0.935 |
|                      | 3 | 1.006    | 0.949 |
|                      |   |          |       |
| BRAFi<br>2 $\mu$ M   | 1 | 0.930    | 0.722 |
|                      | 2 | 0.914    | 0.868 |
|                      | 3 | 0.965    | 0.915 |
|                      |   |          |       |
| BRAFi<br>3 $\mu$ M   | 1 | 0.828    | 0.583 |
|                      | 2 | 1.146    | 0.804 |
|                      | 3 | 0.965    | 0.886 |

**72 hours, % of control**

| AXLi, $\mu$ M        |   | Melmet 1 | A375  |
|----------------------|---|----------|-------|
| BRAFi<br>0.1 $\mu$ M | 1 | 0.856    | 1.084 |
|                      | 2 | 0.848    | 1.070 |
|                      | 3 | 0.996    | 0.998 |
|                      |   |          |       |
| BRAFi<br>1 $\mu$ M   | 1 | 0.900    | 1.009 |
|                      | 2 | 0.828    | 1.005 |
|                      | 3 | 1.006    | 1.009 |
|                      |   |          |       |
| BRAFi<br>2 $\mu$ M   | 1 | 0.849    | 1.011 |
|                      | 2 | 0.887    | 1.004 |
|                      | 3 | 1.008    | 1.011 |
|                      |   |          |       |
| BRAFi<br>3 $\mu$ M   | 1 | 0.876    | 1.000 |
|                      | 2 | 0.812    | 0.998 |
|                      | 3 | 1.014    | 1.009 |

|            |
|------------|
| Additivity |
| Synergy    |
| Antagonism |

Synergy < 0.9 - Additivity - 1.1 < Antagonism

## Supplementary Figure S1. Bliss independence scores in differently treated melanoma cell lines.

Melmet 1 and A375 cells were treated with different doses of BRAFi, AXLi or a combination of both as indicated for 24 or 72 hours. Bliss independence in terms of Mortality was calculated as follow:  $=((M_A + M_B) - (M_A * M_B)) / M_{AB}$ , where A and B is cell mortality related to control. < 0.9 indicates Synergy, 0.9 – 1.1 indicates Additivity and > 1.1 indicates Antagonism. Red squares highlight the chosen BRAFi and AXLi doses for mono- and combination treatments presented as cell viability data in Fig. 3c.

# Supplementary Figure S2\_Part 1 out of 4

**a**

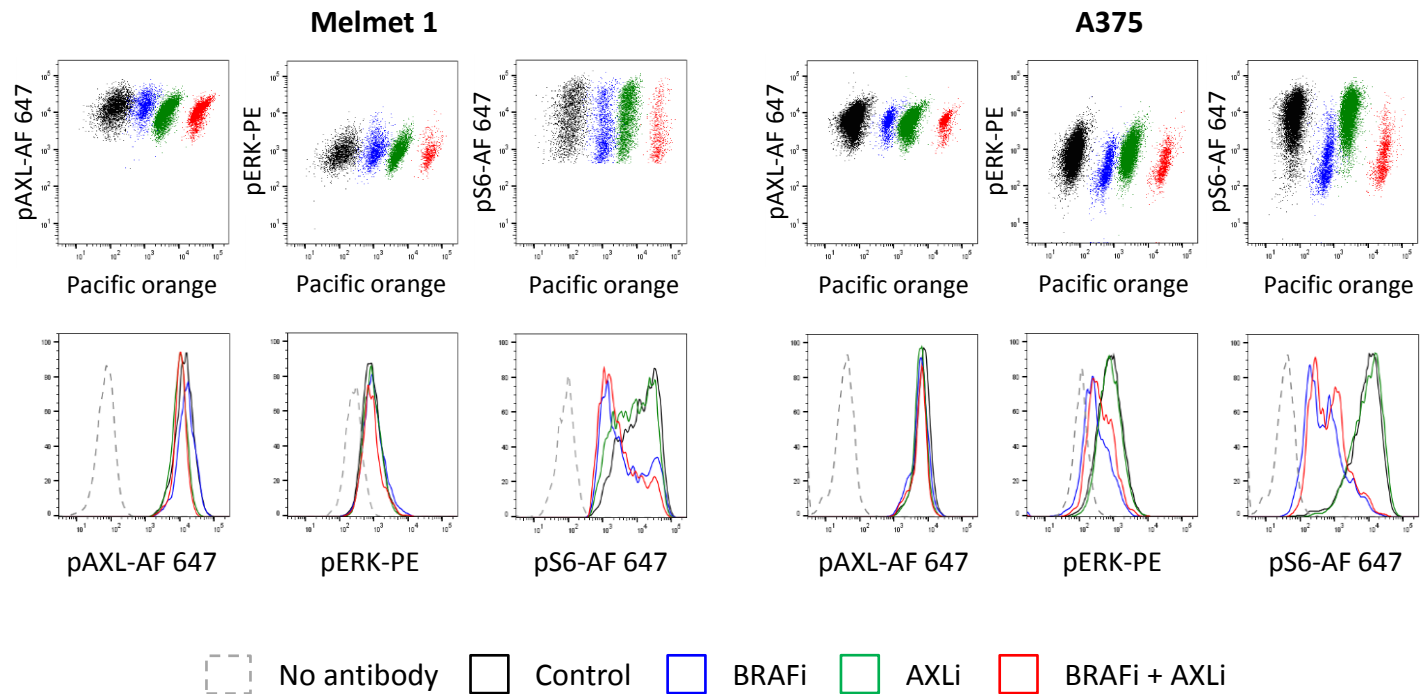

**b**

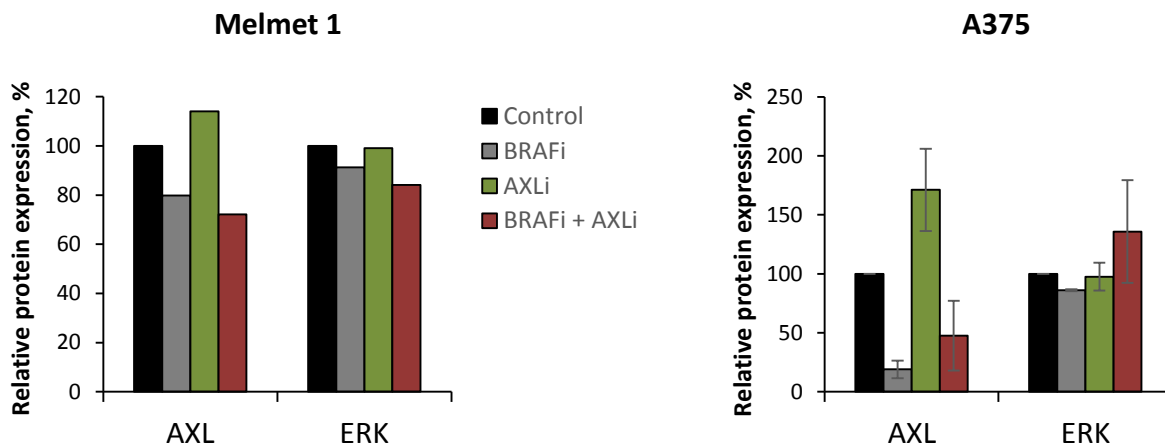

## Supplementary Figure S2. AXL, ERK and S6 protein activity and expression in melanoma cells.

Melanoma cells were treated with 2  $\mu$ M BRAFi, 2  $\mu$ M AXLi or a combination of both for 48 hours and analyzed by FLOW (a) or SWI (b-e). (a) Representative dot plots and histograms of barcoded samples indicating protein activity. AF – Alexa Fluor. (b) The levels of the total proteins (after normalization to the loading control,  $\beta$ -actin) presented as relative to respective non-treated controls set to 100%. n=1 for Melmet 1 and Average  $\pm$  St. Dev, n=2 for A375. c-e) peaks of indicated proteins from SWI in one analyzed set of Melmet 1 (c) and two sets of A375 (d and e). The protein levels were calculated by integration of the area below peaks (colored area) detected by chemiluminescence.

# Supplementary Figure S2\_Part 2 out of 4

C

Melmet 1

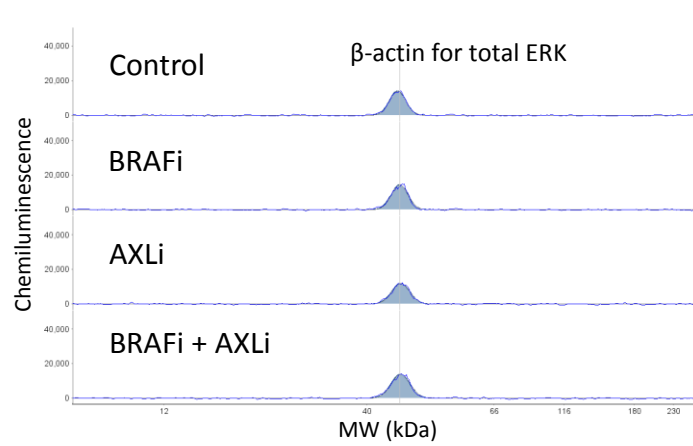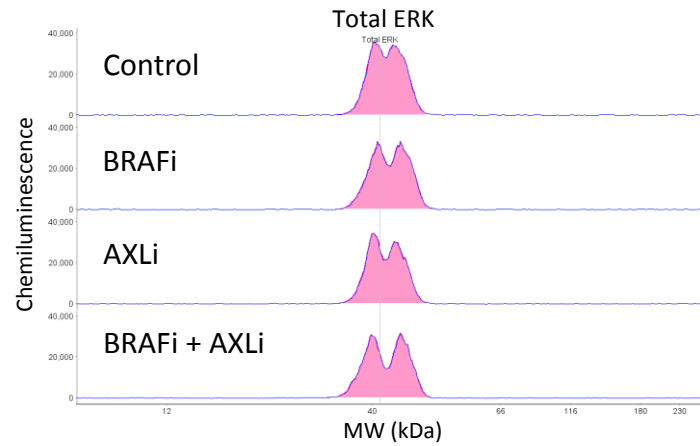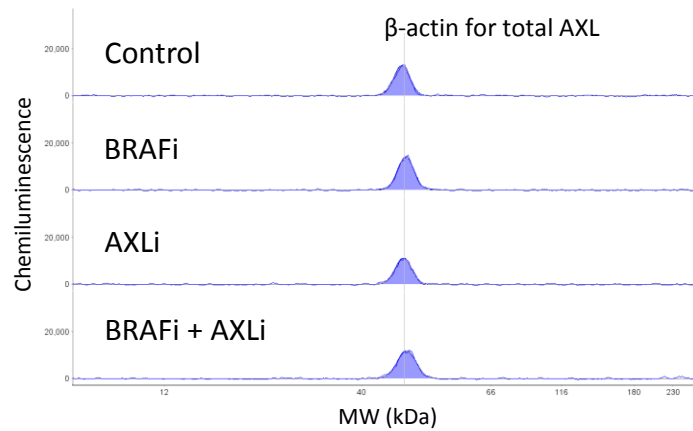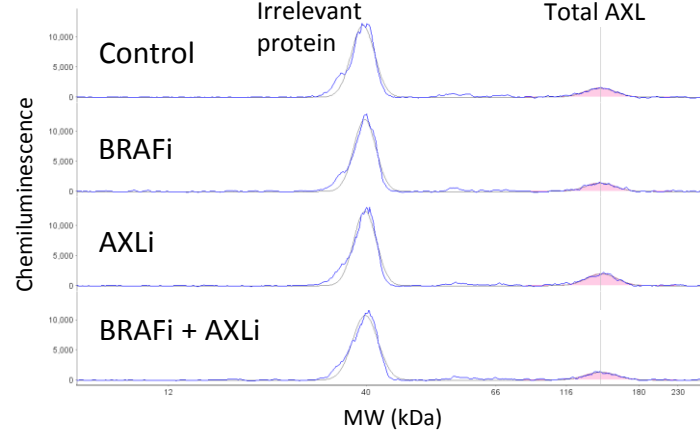

# Supplementary Figure S2\_Part 3 out of 4

d

A375 set No. 1

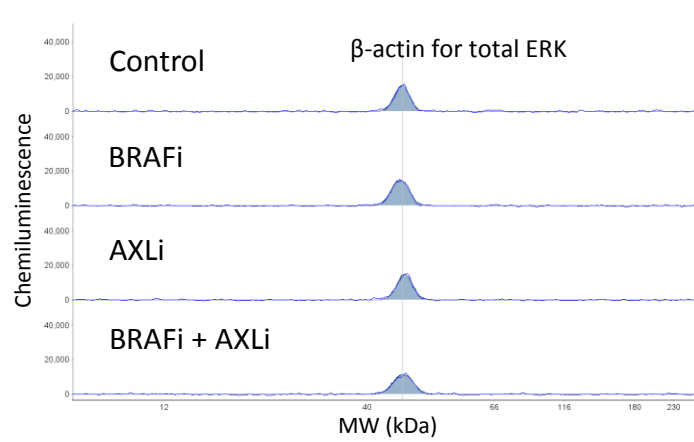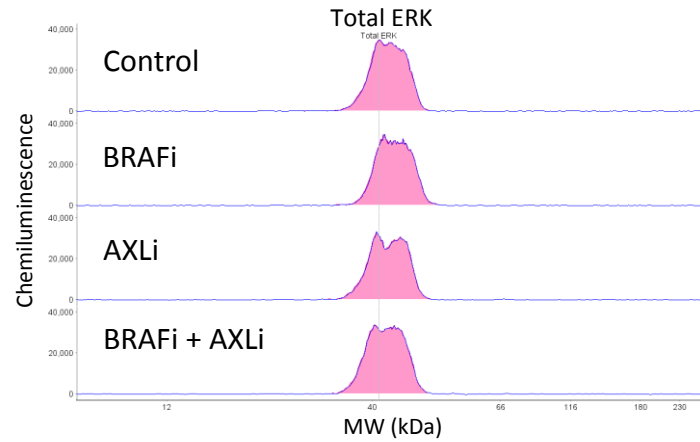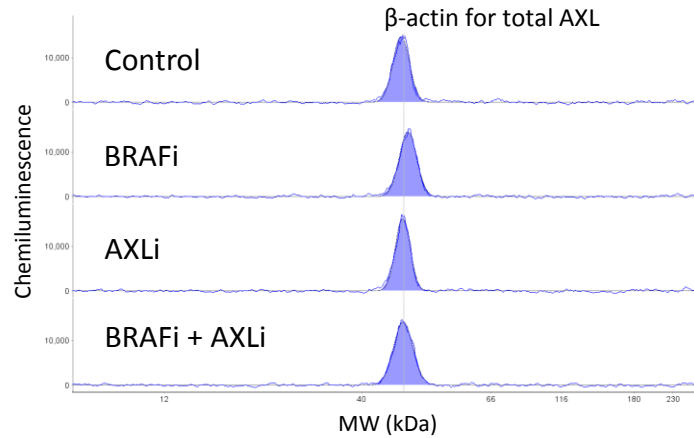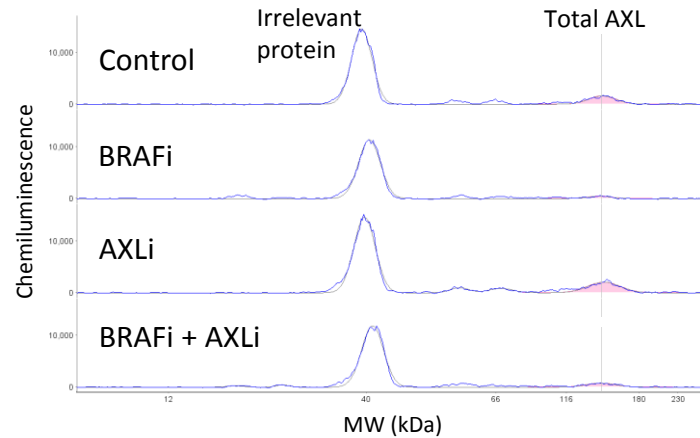

# Supplementary Figure S2\_Part 4 out of 4

e

A375 set No. 2

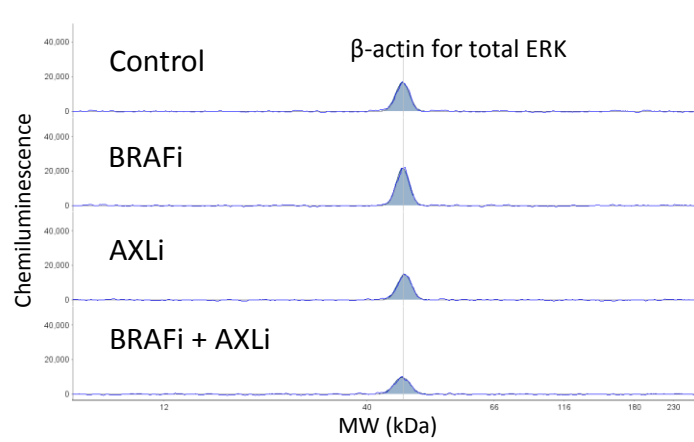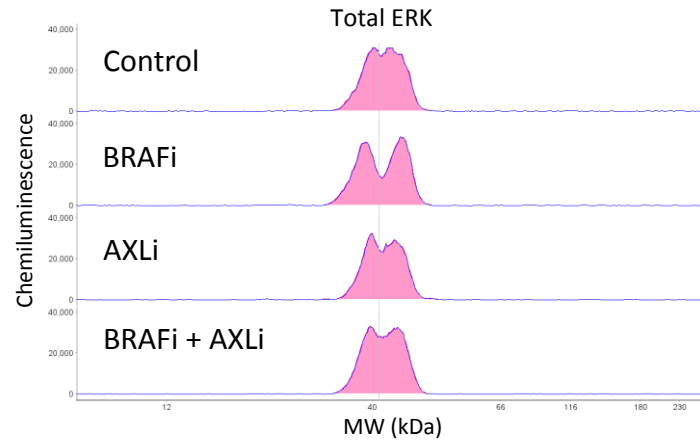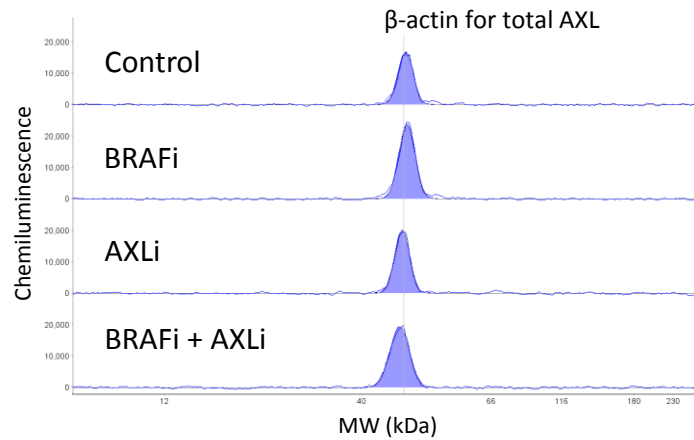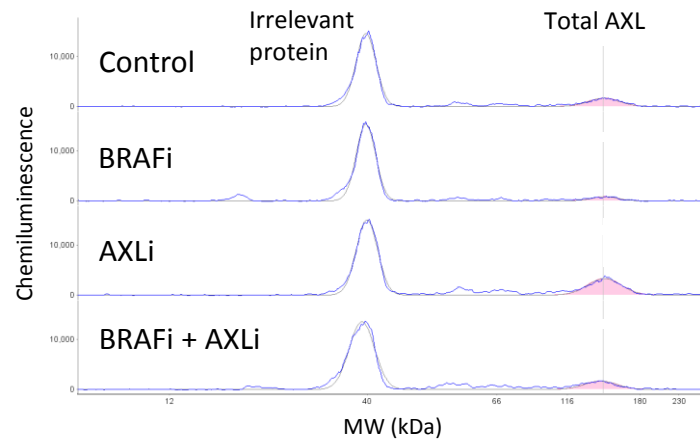

## Supplementary Figure S3

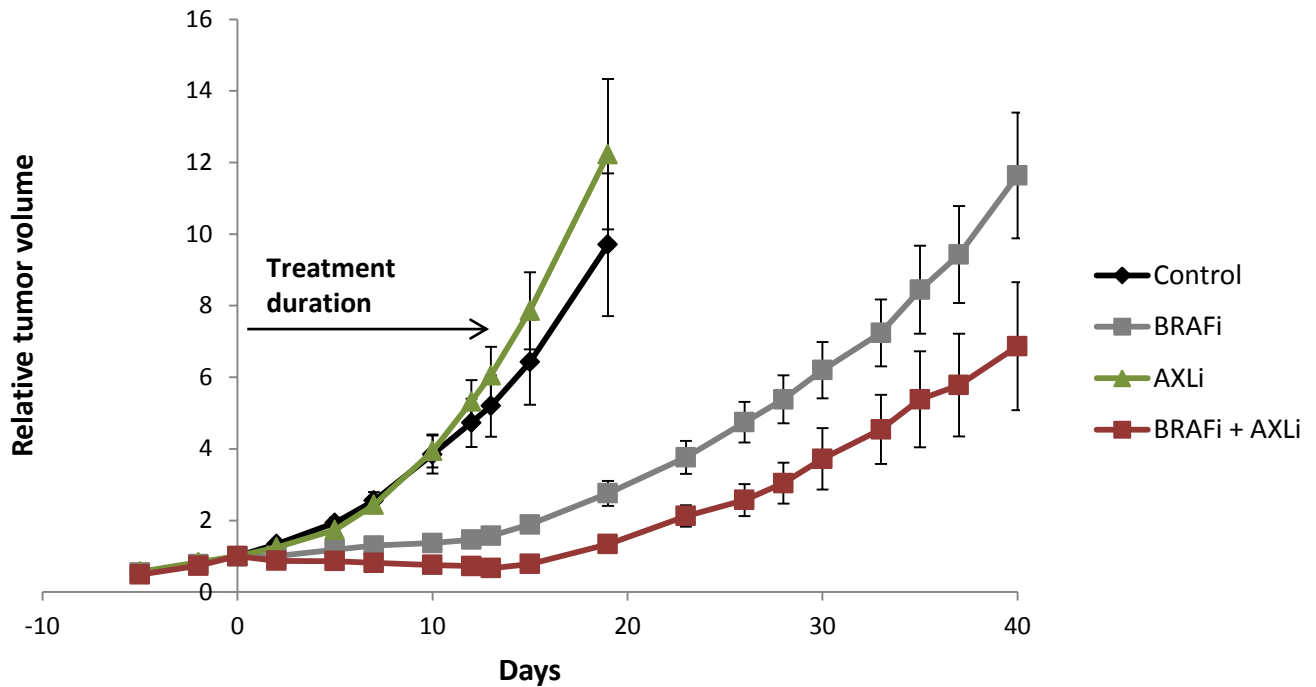

**Supplementary Figure S3. Tumor cells re-grow after treatment withdrawal.** Subcutaneous Melmet 1 tumors were treated with BRAFi: 12.5 mg/kg, AXLi: 50 mg/kg, the combination or vehicle (DMSO/methylcellulose) twice/day for 14 days. The relative tumor volume over time is presented.

## Supplementary Figure S4\_Part 1 out of 5

Day 1

Day 10

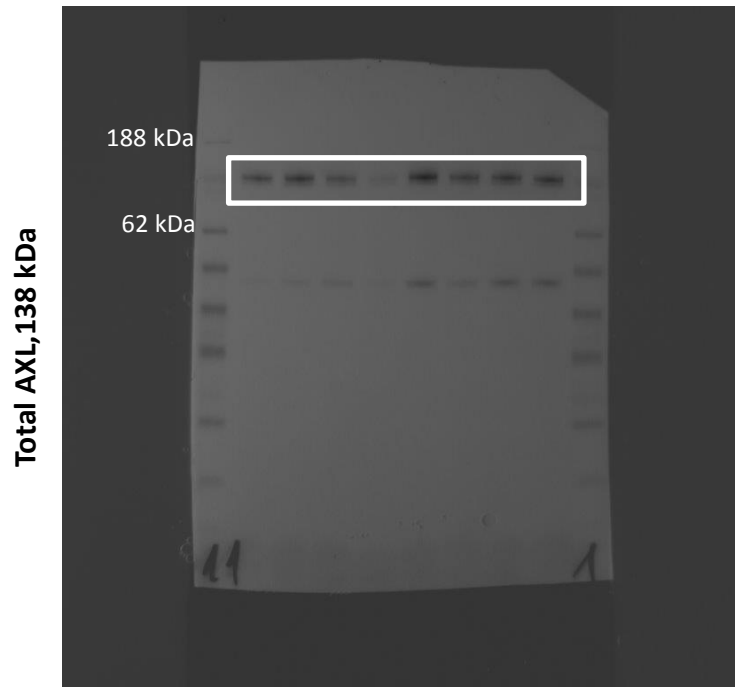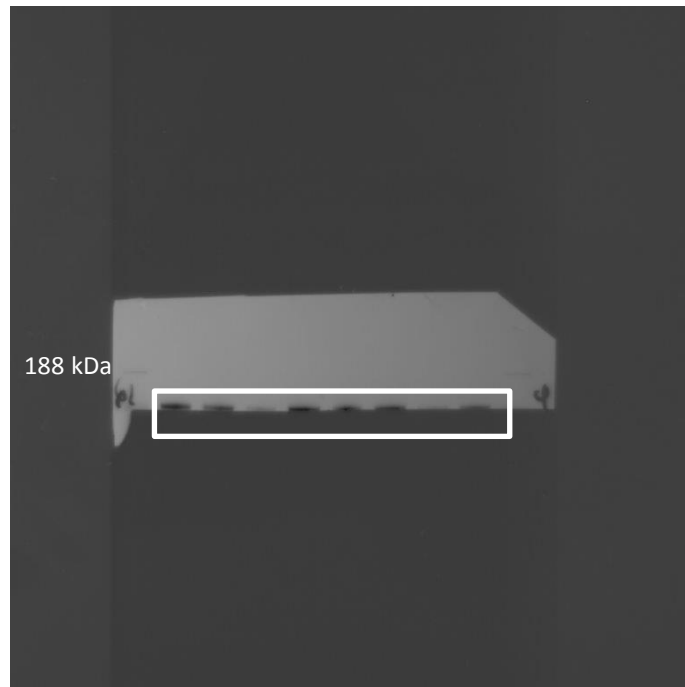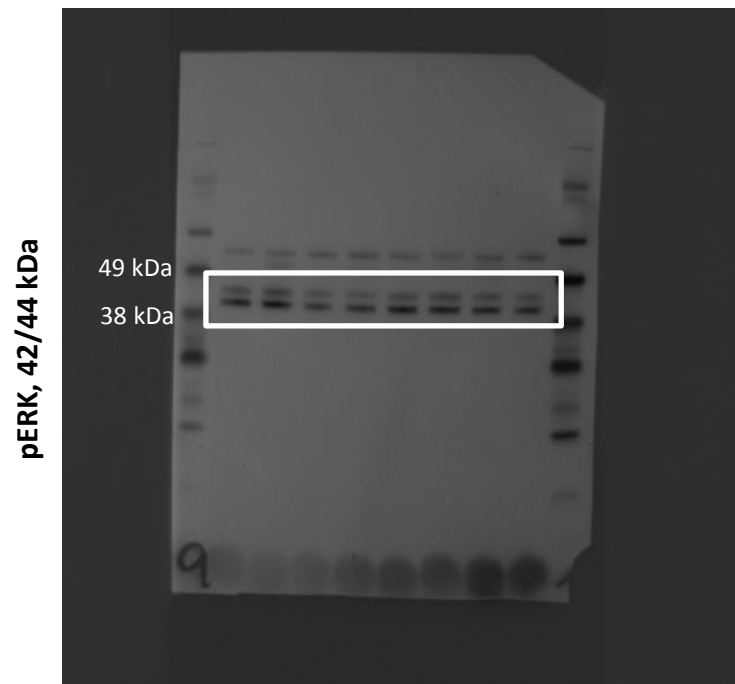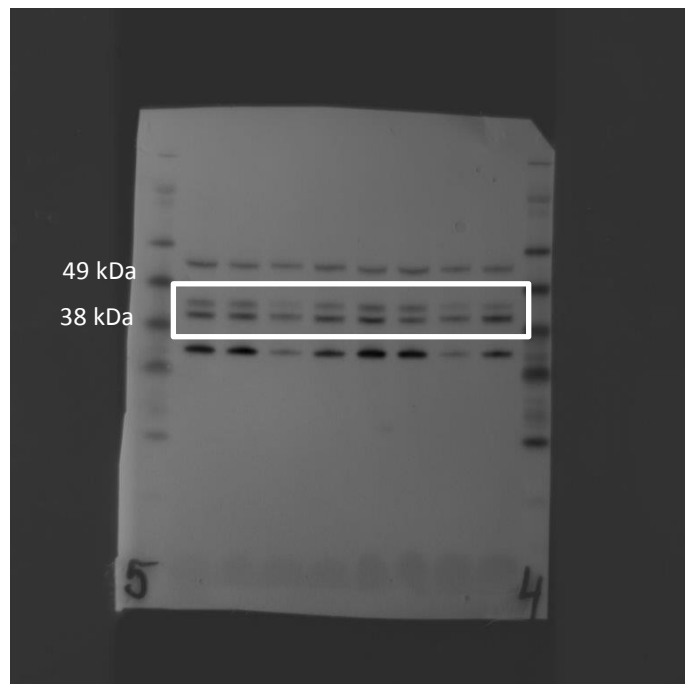

**Supplementary Figure S4. Uncropped Western immunoblots of indicated proteins used in Figure 6b, c.** Merged chemiluminescence and colorimetric image to show the position of the molecular weight markers. The order of samples is the same as in the Figure 6b, c. Protein bands used in the main figure are shown within rectangle.

# Supplementary Figure S4\_ Part 2 out of 5

Day 1

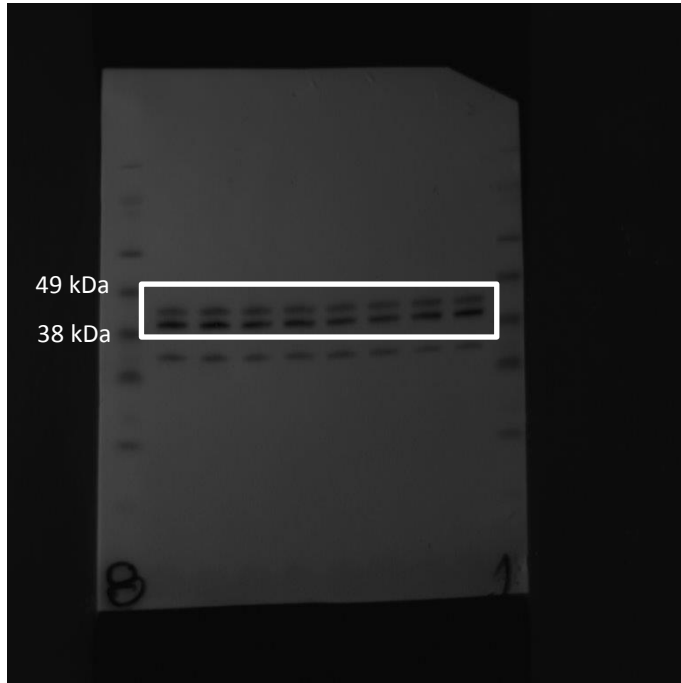

Day 10

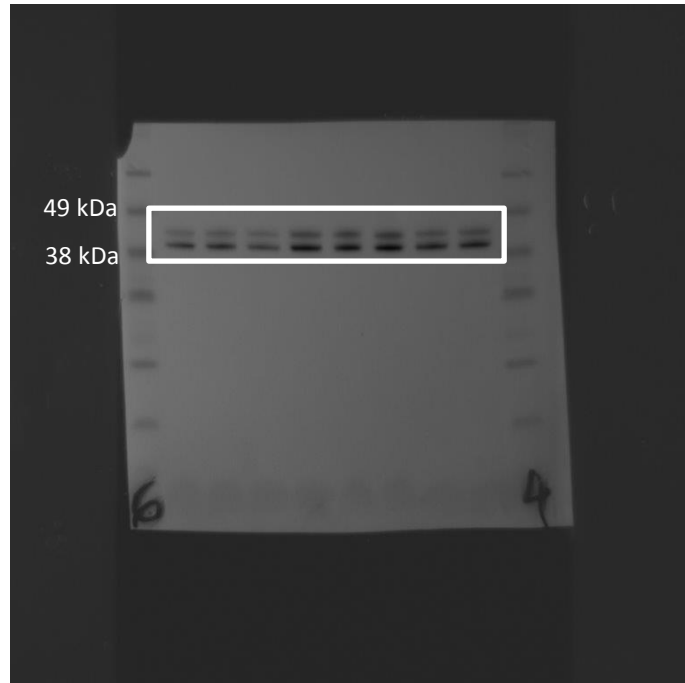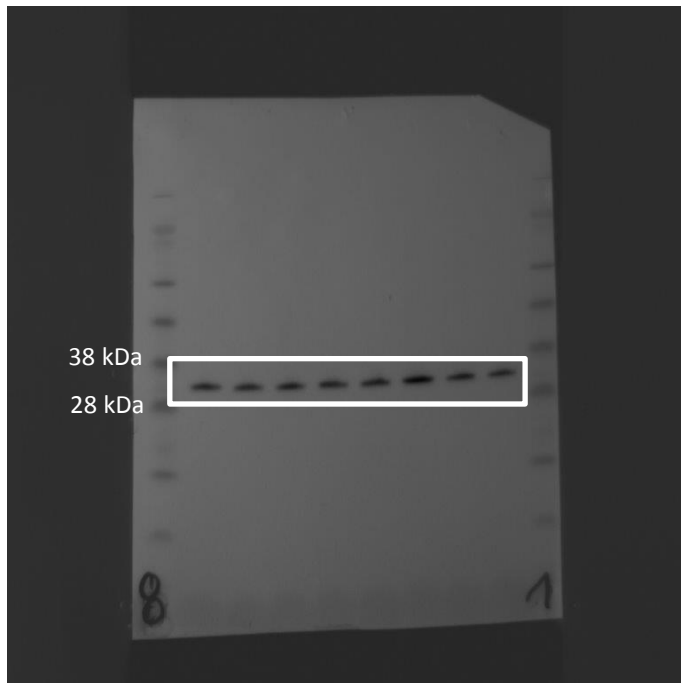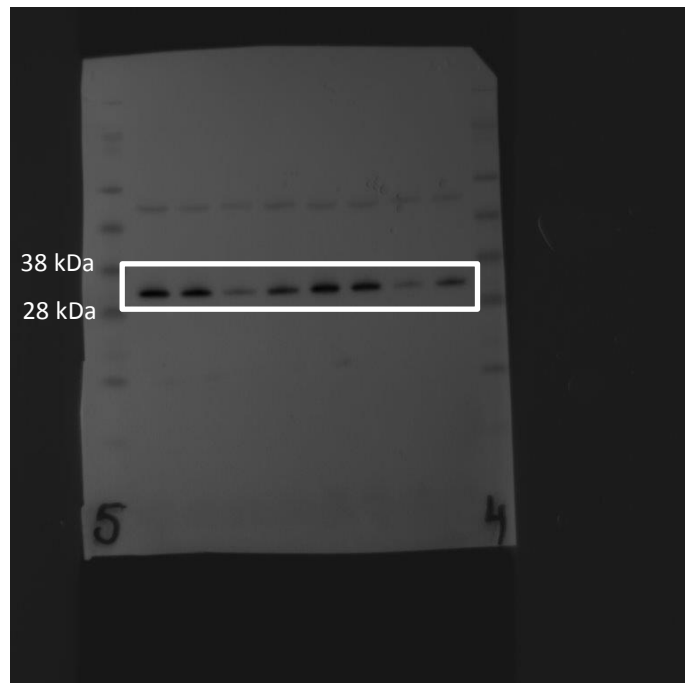

# Supplementary Figure S4\_ Part 3 out of 5

Day 1

Day 10

Total S6, 32kDa

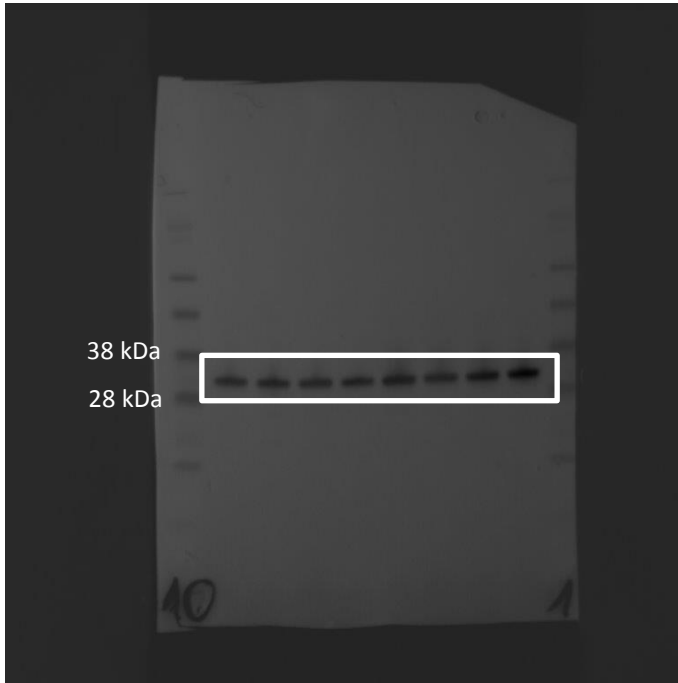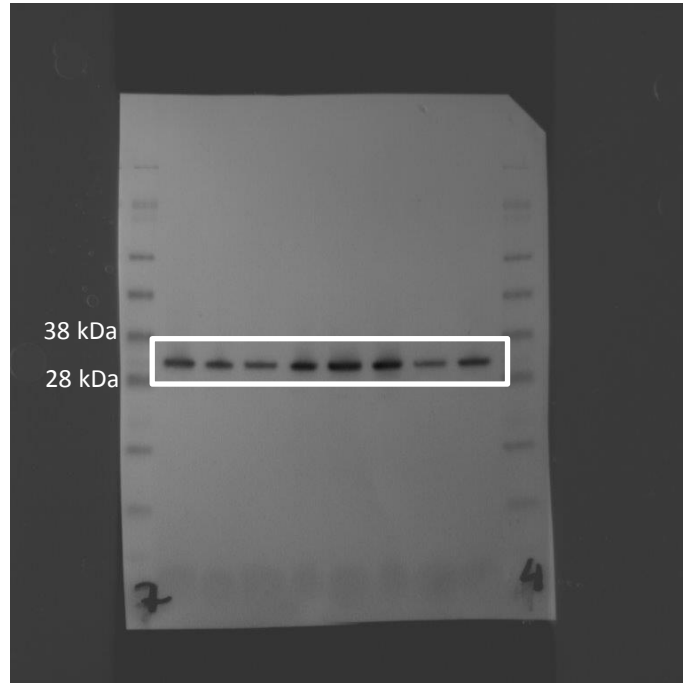

$\alpha$ -tubulin, 52kDa

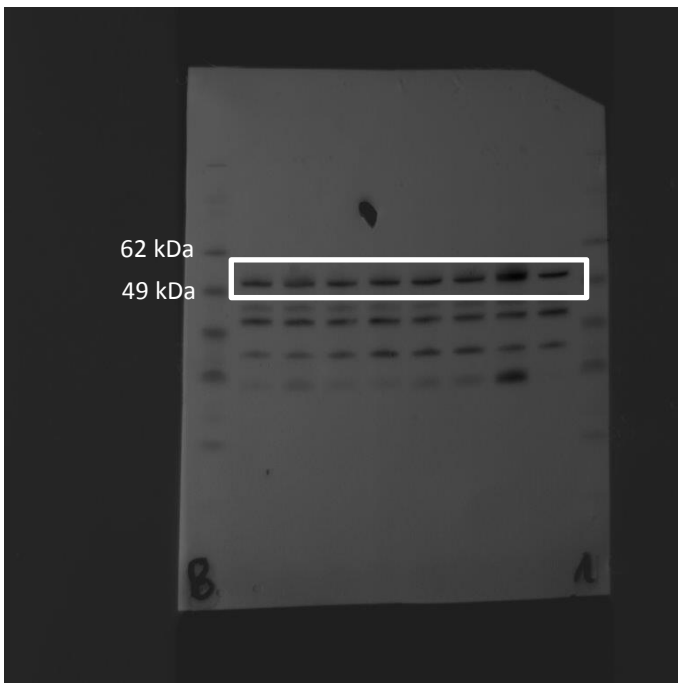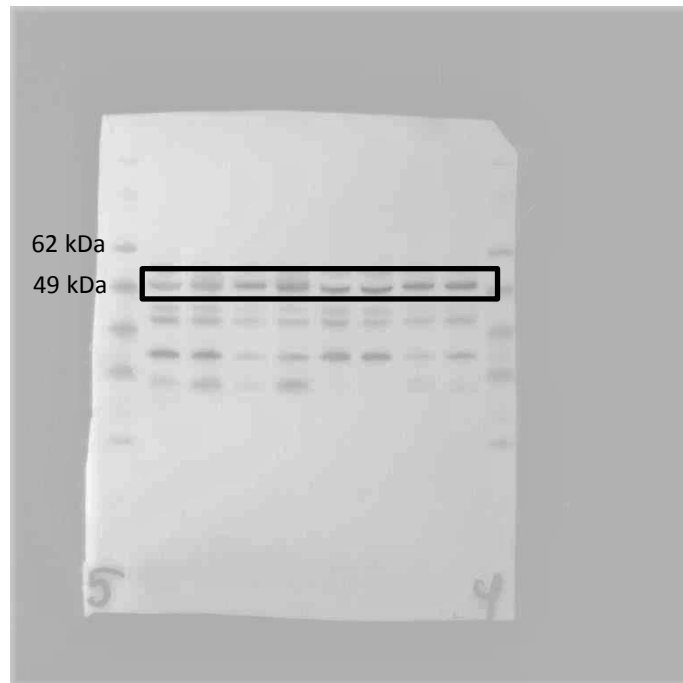

# Supplementary Figure S4\_Part 4 out of 5

Day 1

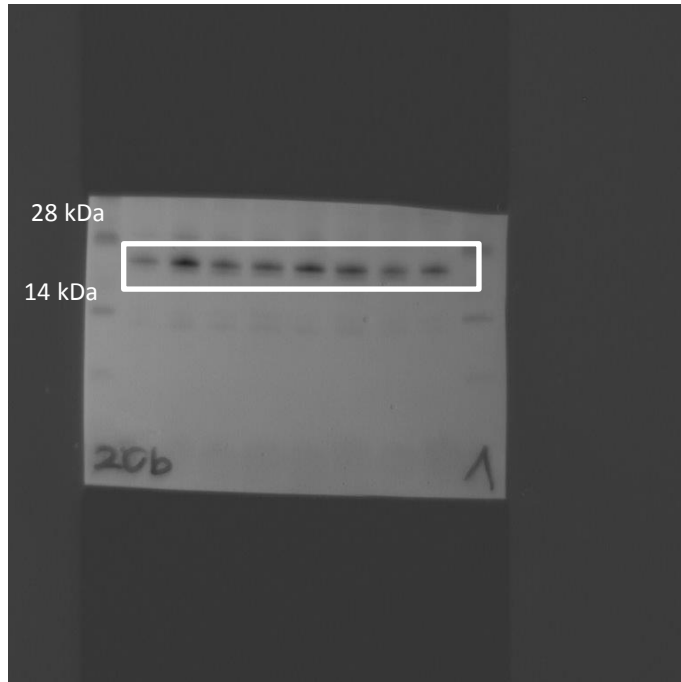

Day 10

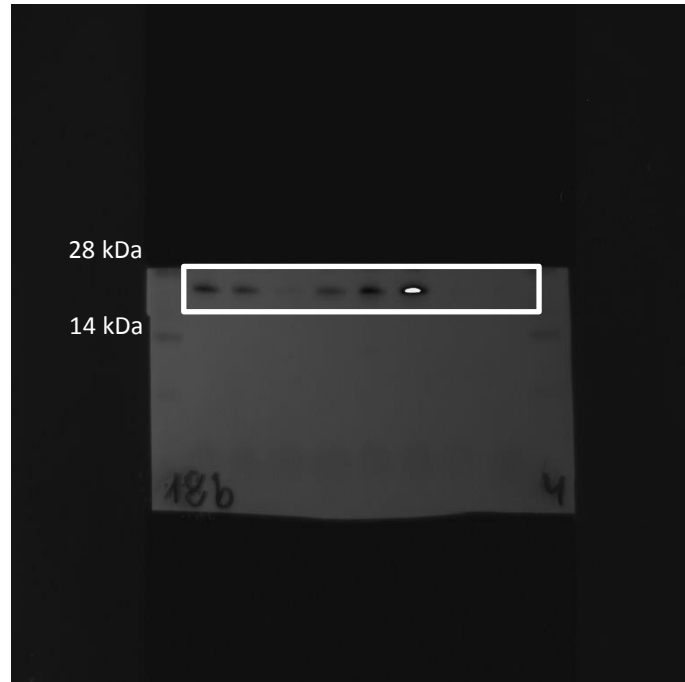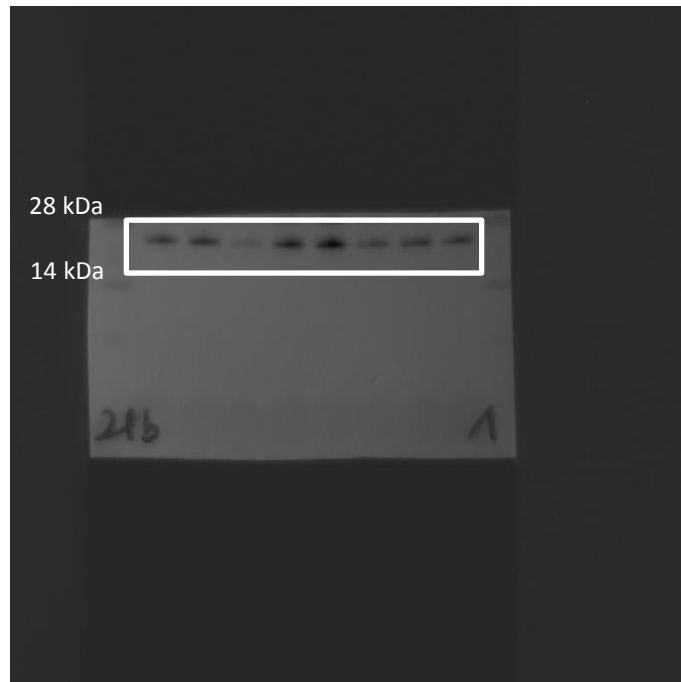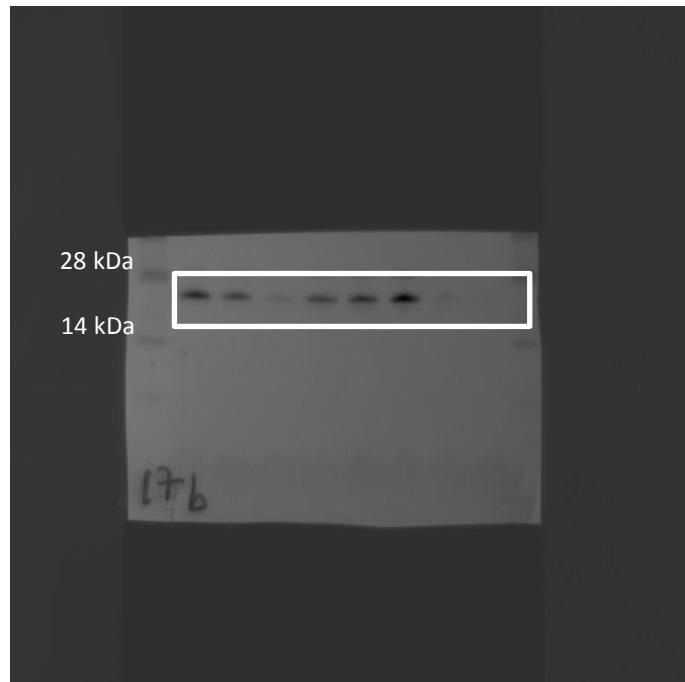

# Supplementary Figure S4\_Part 5 out of 5

Day 1

Day 10

McL-1, 40kDa

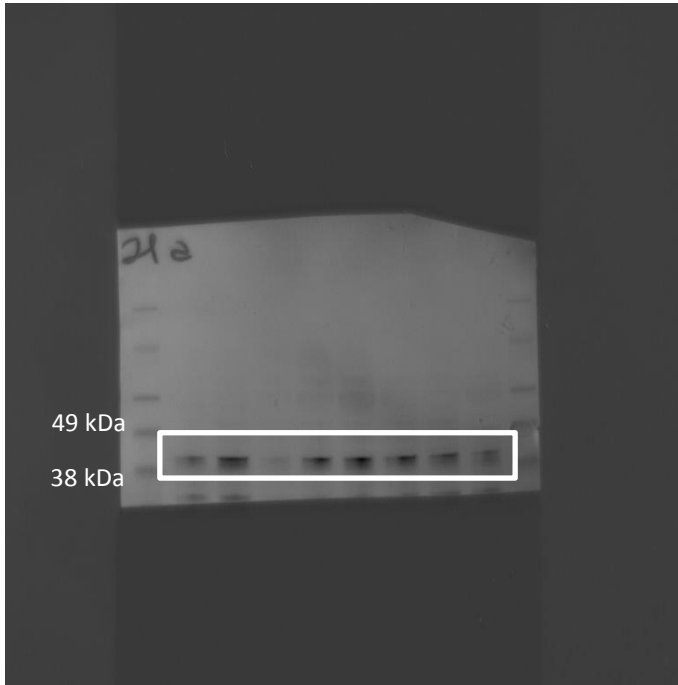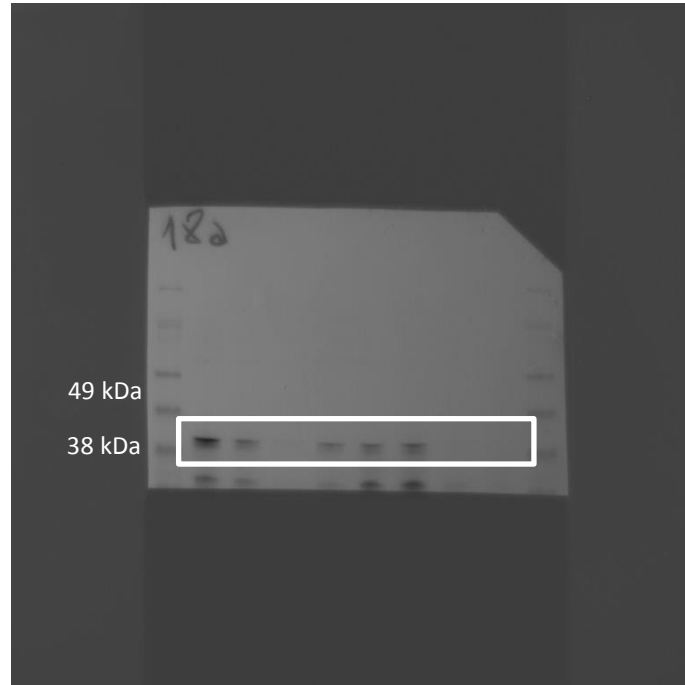

$\beta$ -actin, 45kDa

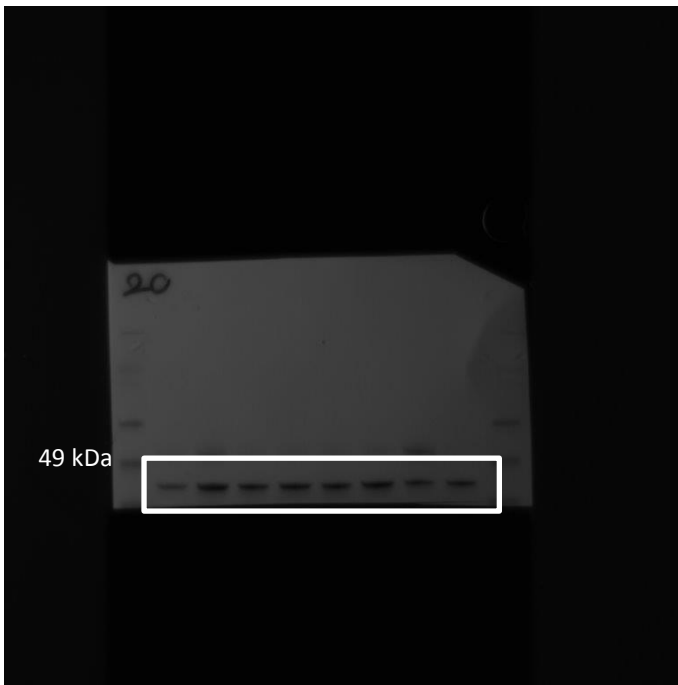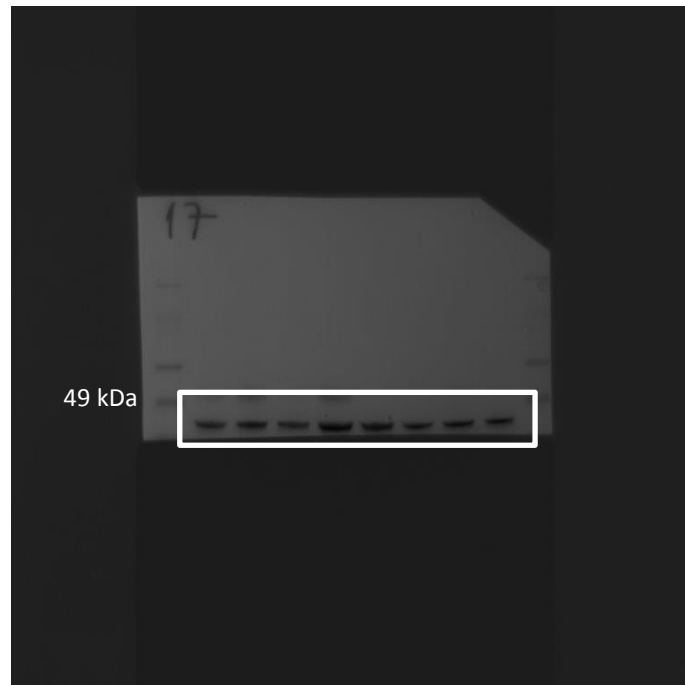

# Supplementary Figure S5

AXLi vs Control (**AXLi effect**)

| Protein        | Log2 FC | p value |
|----------------|---------|---------|
| LC3A-B         | 0.525   | 0.007   |
| B7-H4          | 0.356   | 0.000   |
| Rab25          | 0.287   | 0.025   |
| GCLM           | 0.255   | 0.025   |
| Raptor         | 0.216   | 0.041   |
| p27-Kip-1      | 0.132   | 0.040   |
| ACC_pS79       | -0.154  | 0.037   |
| JNK2           | -0.389  | 0.045   |
| Stat3_pY705    | -0.464  | 0.026   |
| PMS2           | -0.498  | 0.012   |
| mTOR           | -0.556  | 0.005   |
| Ets-1          | -0.618  | 0.032   |
| Akt_pT308      | -0.692  | 0.003   |
| TFRC           | -0.699  | 0.045   |
| PKC-b-II_pS660 | -0.776  | 0.031   |
| b-Catenin      | -1.222  | 0.010   |
| Akt_pS473      | -1.263  | 0.006   |
| eEF2           | -1.529  | 0.034   |

Combination vs BRAFi (**Additive AXLi effect**)

| Protein     | Log2 FC | p value |
|-------------|---------|---------|
| SHP-2_pY542 | 0.511   | 0.028   |
| LC3A-B      | 0.432   | 0.008   |
| B7-H4       | 0.325   | 0.001   |
| N-Cadherin  | -0.177  | 0.033   |
| ACC_pS79    | -0.250  | 0.017   |
| Caveolin-1  | -0.516  | 0.050   |
| mTOR_pS2448 | -0.730  | 0.040   |
| Cyclin-B1   | -0.758  | 0.047   |
| SLC1A5      | -0.895  | 0.013   |

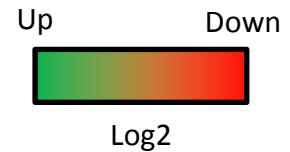

**Supplementary Figure S5. Significantly modulated proteins upon AXLi mono- treatment and as additive effect in combination with BRAFi.** Melmet 1 tumors treated with BRAFi: 12.5 mg/kg, AXLi 50 mg/kg, the combination or vehicle (DMSO/methylcellulose) for ten days (twice a day) were subjected to RPPA analysis and significant AXLi-induced protein changes either upon mono-treatment “AXLi vs control” (left) or as an additive effect when combined with BRAFi “Combination vs BRAFi” (right) is presented. Proteins ranked on Fold Change (FC). Green and red colors indicate up-regulated and down-regulated proteins, respectively.

# Supplementary Figure S6\_Part 1 out of 2

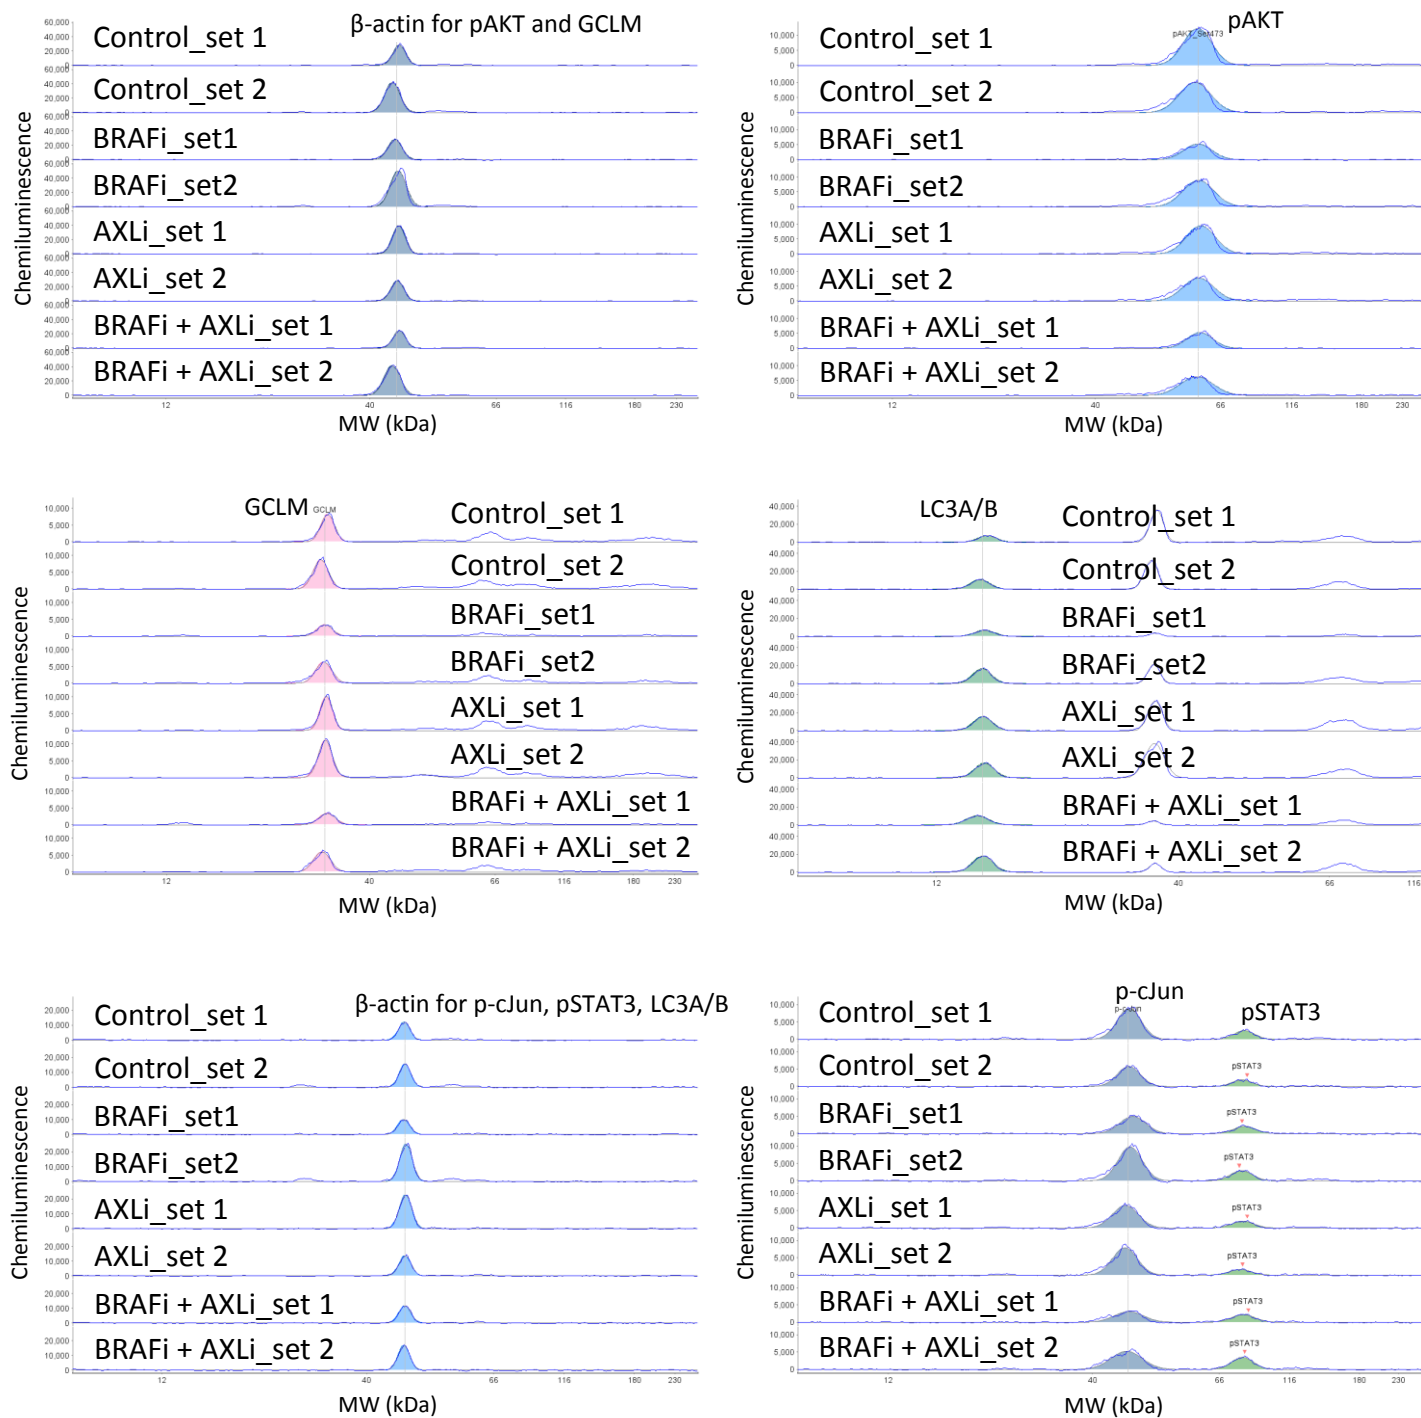

**Supplementary Figure S6.** The peaks of indicated proteins detected by SWI that were used to calculate the protein expression levels presented in Figure 7c. Melmet 1 tumors were treated with BRAFi: 12.5 mg/kg, AXLi 50 mg/kg, the combination or vehicle (DMSO/methylcellulose) for ten days (twice a day). The protein levels were calculated by integration of the area below peaks (colored area) detected by chemiluminescence.

# Supplementary Figure S6\_Part 2 out of 2

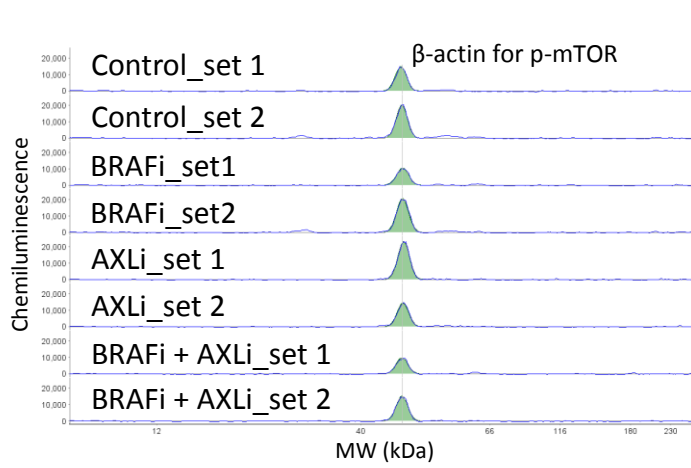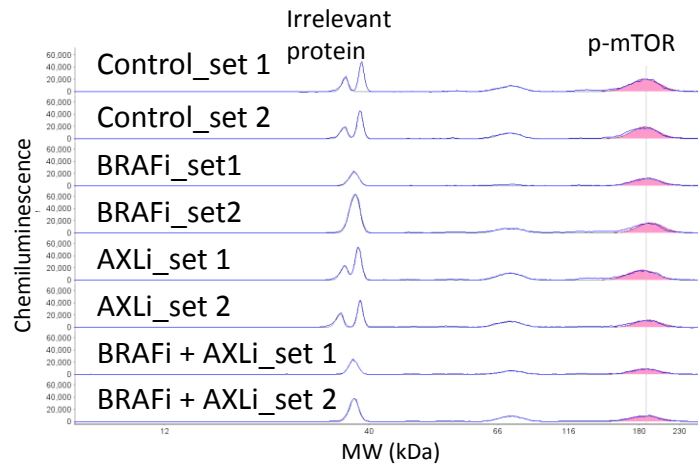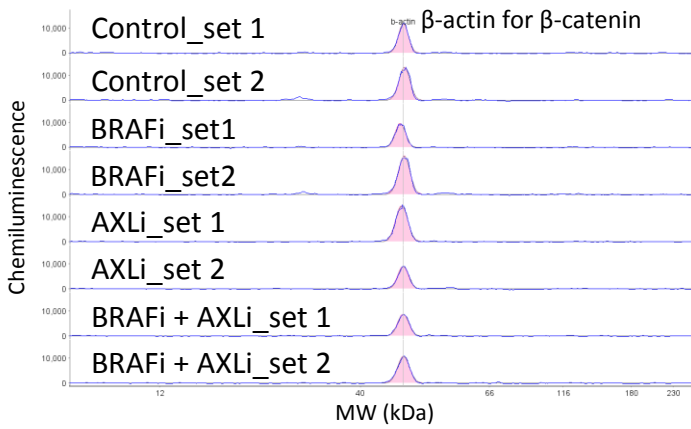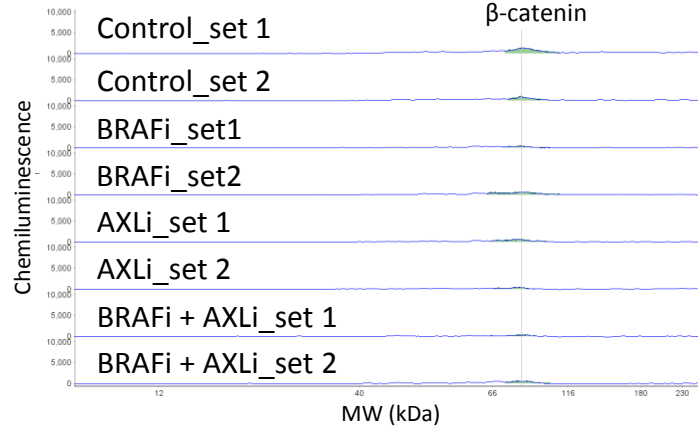

# Supplementary Figure S7

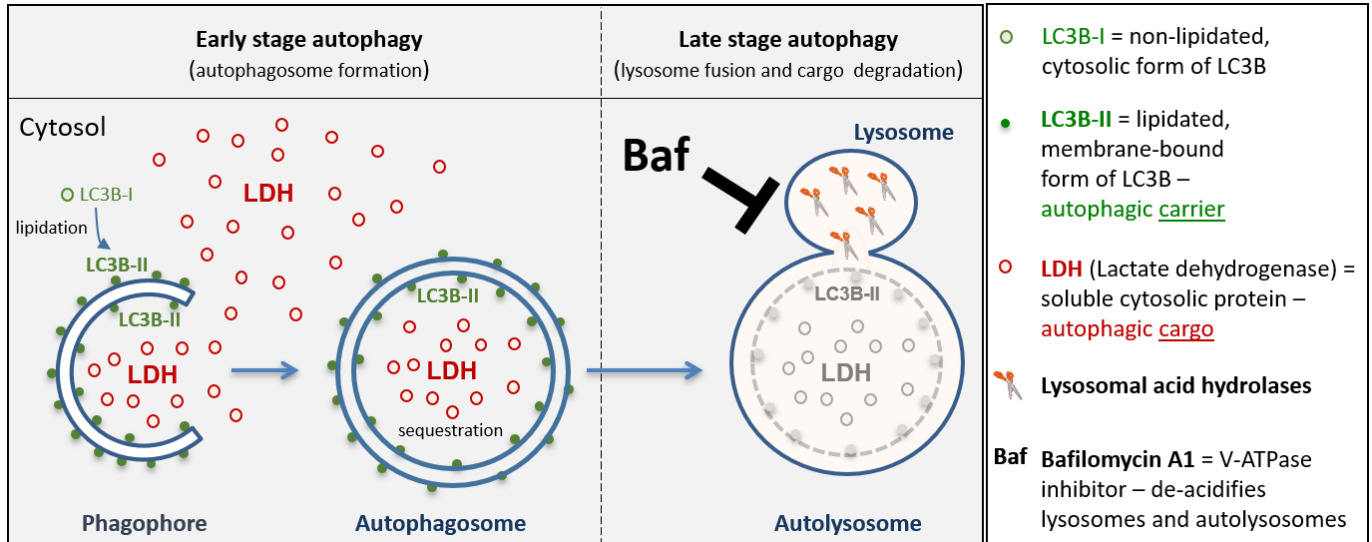

**Supplementary Figure S7. Illustration of the principles for the “LC3B flux assay” (used to measure autophagic membrane flux) and the “LDH sequestration assay” (used to measure autophagic cargo flux) employed in the main Figure 8.** At the early stages of autophagy (left), the cytosolic protein LC3B-I is conjugated to lipids on both sides of the double-membrane autophagosome precursor structure (the «phagophore»), thus generating the membrane-bound form LC3B-II. LC3B-II on the inner membrane stays attached all the way through the pathway to the autophagosome-lysosome fusion step, where after it is degraded by lysosomal proteases (right). The autophagic degradation of LC3B-II can be blocked by treatment with the V-ATPase inhibitor Bafilomycin A1 (Baf), which de-acidifies lysosomes and thereby inactivates the lysosomal acid hydrolases. Changes in LC3B-II levels can therefore be used as a proxy measure of autophagic **membrane flux** through the pathway. If a treatment increases LC3B-II levels in the absence of Baf but not in its presence, it most likely acts to reduce autophagic flux at a late stage in the autophagy pathway. If a treatment is able to increase LC3B-II in the presence of Baf, but not in its absence, it is interpreted to activate autophagy at the early stages of the pathway [1]. Whereas the LC3B flux assay can indicate LC3B-associated autophagic membrane flux, it does not provide any direct information about the actual autophagic **cargo flux**. The lactate dehydrogenase (LDH) sequestration assay can be used to quantify the degree of intracellular sequestration of the soluble cytosolic enzyme LDH into autophagosomes. When the phagophore expands and closes in on itself to form the autophagosome (left), part of the cytosol is included, and thus LDH is sequestered along with other autophagic cargo into the autophagosome. With the same principle as for the LC3B flux assay, the influence of a particular treatment on the flux of LDH through the autophagic pathway can be measured by comparing its sequestration into autophagosomes (and thus its accumulation into the sedimentable cellular fraction) in the absence and presence of Baf. If a treatment increases the levels of sequestered LDH in the absence of Baf but not in its presence, it most likely acts to reduce autophagic flux at a step after autophagosome formation, i.e. at a late stage in the autophagy pathway. If a treatment is able to increase the levels of sequestered LDH in the presence of Baf but not in its absence, it is interpreted to activate autophagy at an early stage of the pathway, resulting in increased autophagosome formation [1, 2].

# Supplementary Figure S8

**Sample set No. 1**\_used for both the representative image and quantification

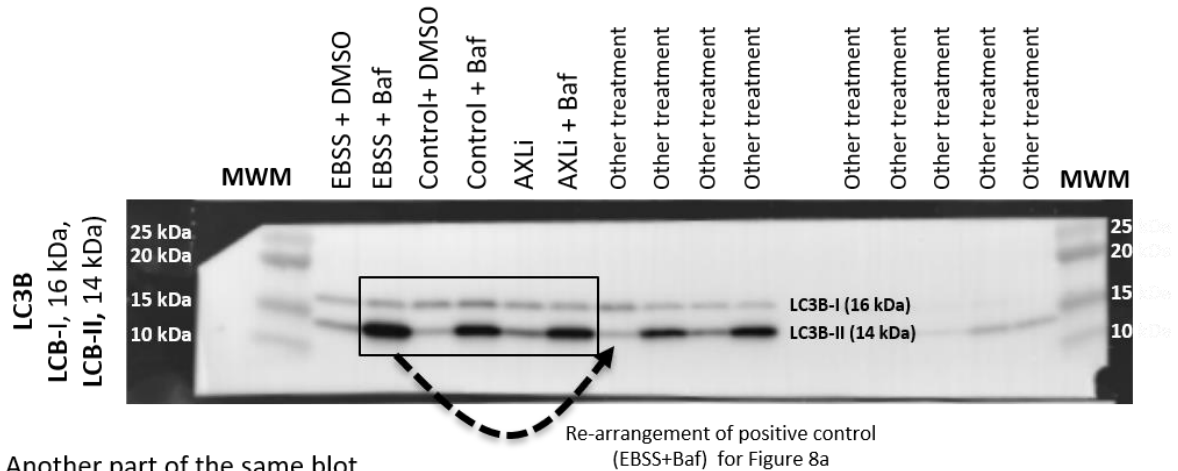

Another part of the same blot

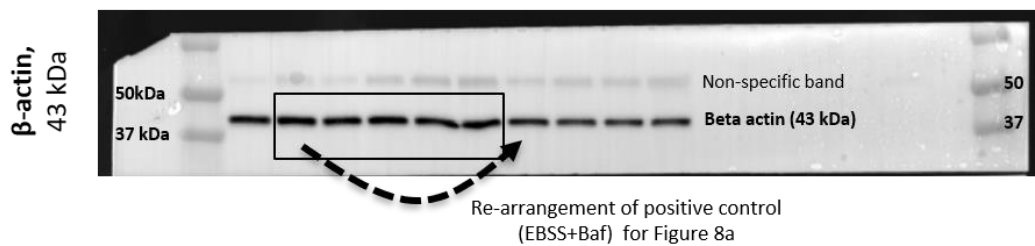

**Sample set No. 2**\_used for quantification only

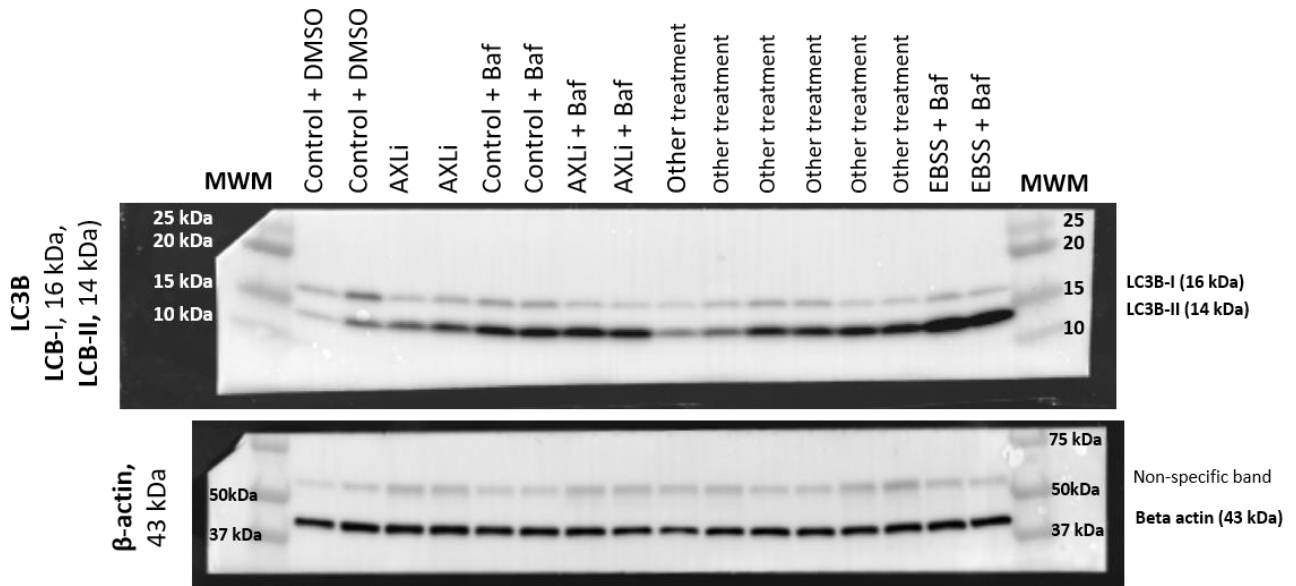

**Supplementary Figure S8. Uncropped Western immunoblots of indicated proteins used in Figure 8a.** Merged chemiluminescence and colorimetric image to show the position of the molecular weight markers. Protein bands used in the main figure are shown within rectangle.

# Supplementary Figure S9

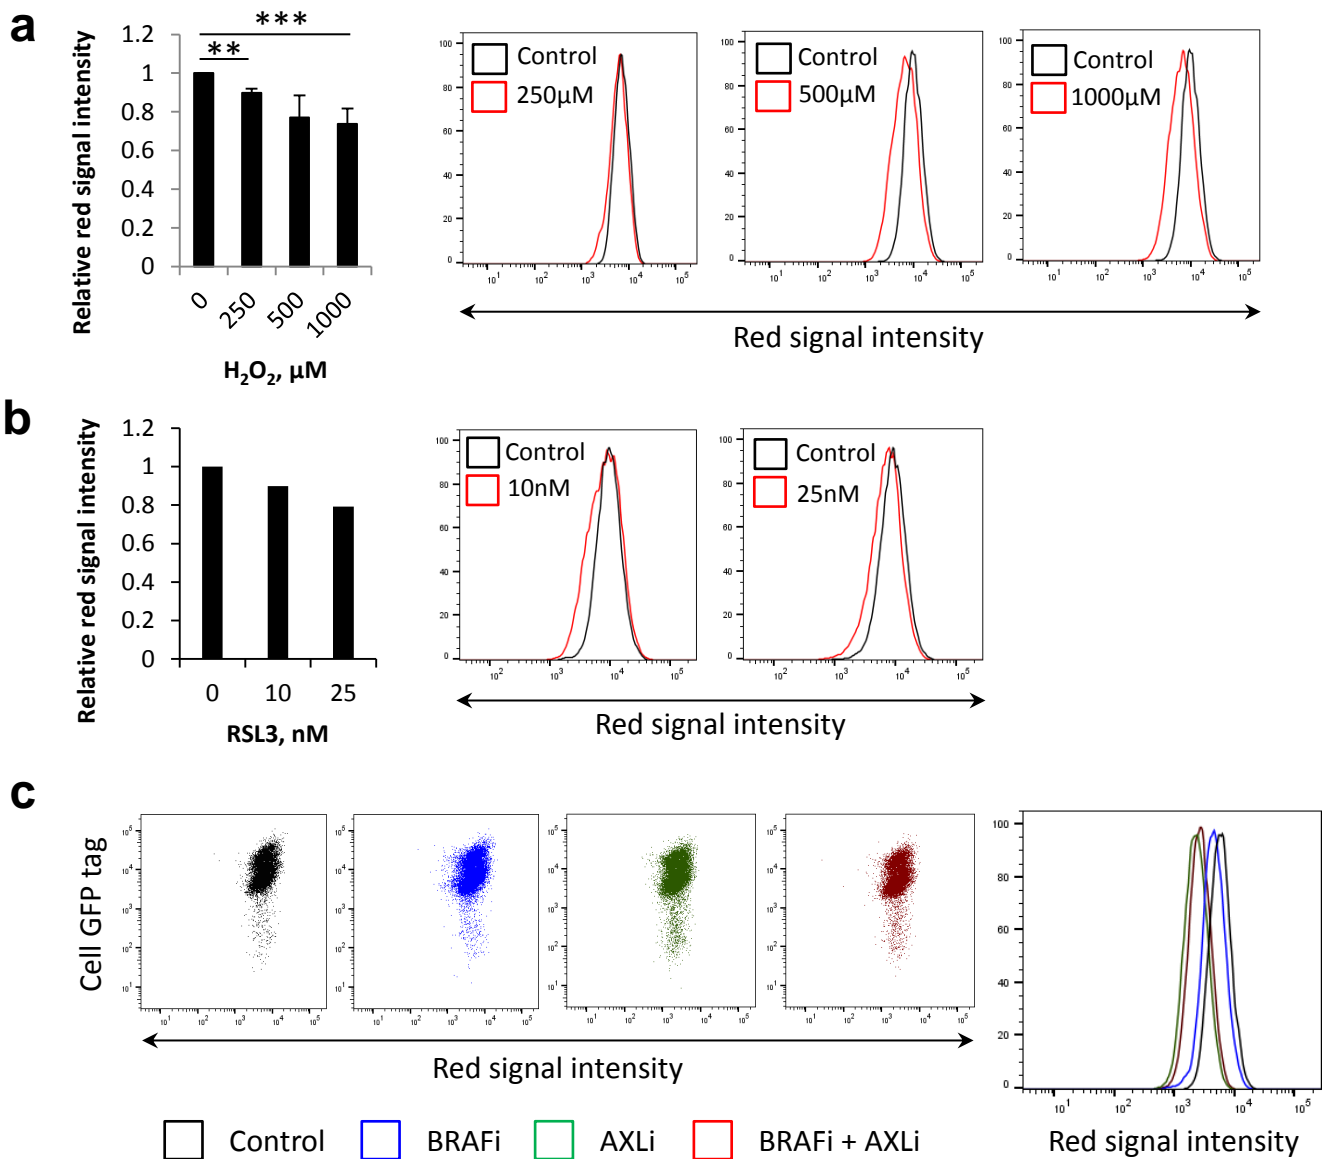

**Supplementary Figure S9. Detection of lipid peroxidation in mono- and combination treatment with BRAFi and AXLi.** Red signal intensities of lipid peroxidation sensor measured by FLOW (recording  $\geq 1 \times 10^4$  cells) in differently treated Melmet 1 cells. **a, b**) Melmet 1 cells were treated with increasing concentration of hydrogen peroxide (H<sub>2</sub>O<sub>2</sub>) and ferroptosis inducer RSL3 for 0.5 and 24 hours, respectively. Relative signal mean intensities were calculated and related to respective controls. Representative histograms of indicated samples are shown. Average  $\pm$  SEM, n=3 for H<sub>2</sub>O<sub>2</sub> and n=1 for RSL3 data. \*\*,  $p \leq 0.01$ ; and \*\*\*,  $p \leq 0.001$ . **c**) Melmet 1 cells were treated with 2 μM BRAFi, 1 μM AXLi or a combination of both, DMSO for control for 72 hours. Representative dot plots and histograms of differently treated samples are shown. Red signal intensities were measured in PE channel.

## Supplementary Figure S10

**a**

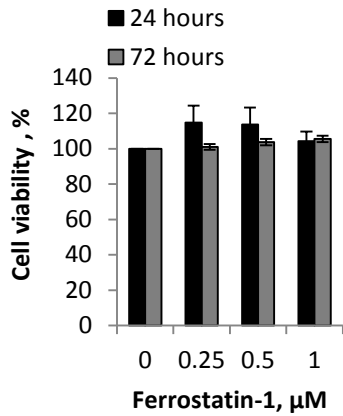

**b**

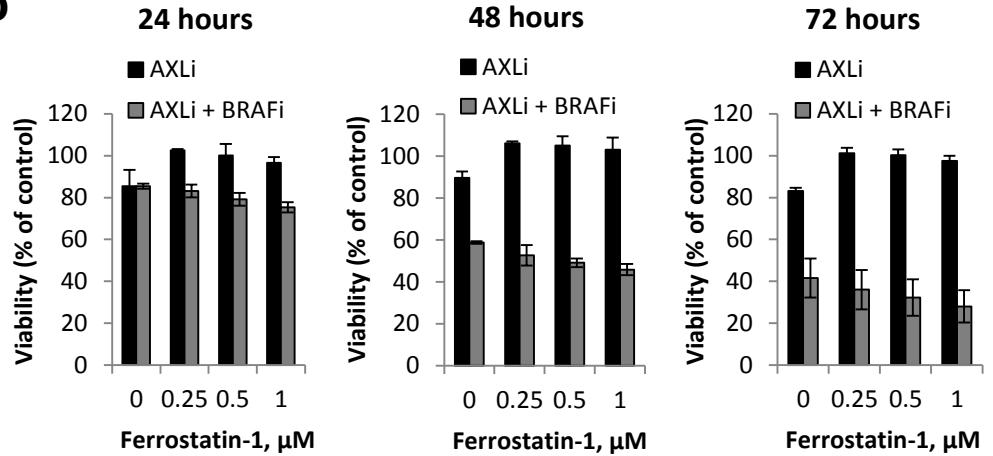

**Supplementary Figure S10. Effect of ferroptosis inhibitor on cell viability in mono- and combination treatment with BRAFi and AXLi.** Cell viability of Melmet 1 cells treated with different concentrations of the ferroptosis inhibitor ferrostatin - 1 (Fer-1), as indicated in mono- (**a**) or in combination treatment with either 0.5  $\mu\text{M}$  AXLi alone or 2  $\mu\text{M}$  BRAFi and 0.5  $\mu\text{M}$  AXLi for 24, 48 or 72 hours (**b**). The treatment effect was scored by CellTiterGlo assay and presented as % relative to the respective non-treated controls set to 100%. (**a**) Average  $\pm$  SEM,  $n=3$ . (**b**) Average  $\pm$  St. Dev. for 24 and 48 hours,  $n=1$  and Average  $\pm$  SEM for 72 hours,  $n=3$ .

**Supplementary Table S1. AXL expression and characteristics of the patients.** \*Data are shown as number of patients and percentage of known data.

| AXL Expression                                  |                   |           |                 |         |
|-------------------------------------------------|-------------------|-----------|-----------------|---------|
| Characteristics                                 | Variable          | Low < 10% | High $\geq$ 10% | P value |
|                                                 |                   | n (%)*    | n (%)*          |         |
| Age, n = 72                                     | < 60 years        | 18 (25)   | 17 (23.6)       | .650    |
|                                                 | $\geq$ 60 years   | 21 (29.2) | 16 (22.2)       |         |
| Gender, n = 72                                  | Female            | 11 (15.3) | 12 (16.7)       | .459    |
|                                                 | Male              | 28 (38.9) | 21 (29.2)       |         |
| Melanoma type, n = 57                           | Superficial       | 16 (28.1) | 12 (21.1)       | .705    |
|                                                 | Nodular           | 18 (31.6) | 11 (19.3)       |         |
| Tumor thickness, n = 60                         | T1 $\leq$ 1.00 mm | 2 (3.3)   | 3 (5)           | .316    |
|                                                 | T2 1.01 - 2.00 mm | 10 (16.7) | 11 (18.3)       |         |
|                                                 | T3 2.01 - 4.00 mm | 8 (13.3)  | 4 (6.7)         |         |
|                                                 | T4 > 4 mm         | 13 (21.7) | 9 (15)          |         |
| Ulceration, n = 52                              | No                | 16 (30.8) | 11 (21.2)       | .812    |
|                                                 | Yes               | 14 (26.9) | 11 (21.2)       |         |
| Primary location, n = 65                        | Head-neck         | 3 (4.6)   | 2 (3.1)         | .514    |
|                                                 | Back-shoulders    | 15 (23.1) | 11 (16.9)       |         |
|                                                 | Front torso       | 8 (12.3)  | 6 (9.2)         |         |
|                                                 | Arms              | 3 (4.6)   | 2 (3.1)         |         |
|                                                 | Legs              | 7 (10.8)  | 8 (12.3)        |         |
| Time primary lesion to local metastasis, n = 65 | Months            | 36 (55.5) | 29 (44.6)       | .286    |
| BRAF <sup>V600</sup> mutation,                  | Negative          | 6 (15)    | 11 (27.5)       | .530    |

|                       |          |          |           |     |
|-----------------------|----------|----------|-----------|-----|
| n = 40                |          |          |           |     |
|                       | Positive | 6 (15)   | 17 (42.5) |     |
| NRAS mutation, n = 40 | Negative | 9 (22.5) | 21 (52.5) | 1.0 |
|                       | Positive | 3 (7.5)  | 7 (17.5)  |     |

**Supplementary Table S2. Top most affected signaling pathways in differently treated Melmet 1 tumors**

| <b>BRAFi vs Control (BRAFi effect)</b>        |                 |            |
|-----------------------------------------------|-----------------|------------|
| <b>KEGG Pathways</b>                          | <b>Strength</b> | <b>FDR</b> |
| Central carbon metabolism in cancer           | 1.83            | 0.0145     |
| Adipocytokine signaling pathway               | 1.8             | 0.0145     |
| Chronic myeloid leukemia                      | 1.76            | 0.0145     |
| ErbB signaling pathway                        | 1.72            | 0.0145     |
| Endocrine resistance                          | 1.66            | 0.0145     |
| Prostate cancer                               | 1.65            | 0.0145     |
| HIF-1 signaling pathway                       | 1.65            | 0.0145     |
| Insulin resistance                            | 1.61            | 0.0145     |
| AMPK signaling pathway                        | 1.56            | 0.0145     |
| Proteoglycans in cancer                       | 1.52            | 0.0058     |
| Insulin signaling pathway                     | 1.51            | 0.0145     |
| Cell adhesion molecules (CAMs)                | 1.5             | 0.0145     |
| <b>Reactome Pathway</b>                       | <b>Strength</b> | <b>FDR</b> |
| Constitutive Signaling by AKT1 E17K in Cancer | 2.22            | 0.0067     |
| VEGFR2 mediated vascular permeability         | 2.21            | 0.0067     |
| PI3K/AKT Signaling in Cancer                  | 1.88            | 0.0014     |
| Costimulation by the CD28 family              | 1.85            | 0.0115     |
| Macroautophagy                                | 1.82            | 0.0115     |
| Cell-Cell communication                       | 1.53            | 0.0204     |

|                                                |      |        |
|------------------------------------------------|------|--------|
| Cell surface interactions at the vascular wall | 1.51 | 0.0215 |
|------------------------------------------------|------|--------|

### Combination vs AXLi (Additive BRAFi effect)

| KEGG Pathways                           | Strength | FDR     |
|-----------------------------------------|----------|---------|
| Apoptosis - multiple species            | 1.76     | 0.0048  |
| Renal cell carcinoma                    | 1.59     | 0.0011  |
| Type II diabetes mellitus               | 1.59     | 0.0078  |
| Progesterone-mediated oocyte maturation | 1.58     | 0.00053 |
| HIF-1 signaling pathway                 | 1.56     | 0.00053 |
| Insulin resistance                      | 1.52     | 0.00053 |
| ErbB signaling pathway                  | 1.51     | 0.0017  |

| Reactome Pathway                                                    | Strength | FDR    |
|---------------------------------------------------------------------|----------|--------|
| Activation, myristoylation of BID and translocation to mitochondria | 2.65     | 0.0043 |
| Polo-like kinase mediated events                                    | 2.05     | 0.0212 |
| Cyclin A/B1/B2 associated events during G2/M transition             | 1.85     | 0.0212 |
| MAPK targets/ Nuclear events mediated by MAP kinases                | 1.76     | 0.0212 |
| RET signaling                                                       | 1.67     | 0.0216 |
| Interleukin-3, Interleukin-5 and GM-CSF signaling                   | 1.58     | 0.0269 |

| AXLi vs Control (AXLi effect)                        |          |            |
|------------------------------------------------------|----------|------------|
| KEGG Pathways                                        | Strength | FDR        |
| Ferroptosis                                          | 1.94     | 0.0001     |
| Autophagy - other                                    | 1.88     | 0.0015     |
| Adipocytokine signaling pathway                      | 1.82     | 0.0000166  |
| Pancreatic cancer                                    | 1.79     | 0.0000166  |
| Longevity regulating pathway - multiple species      | 1.75     | 0.00027    |
| Acute myeloid leukemia                               | 1.72     | 0.0003     |
| Prolactin signaling pathway                          | 1.7      | 0.00032    |
| Type II diabetes mellitus                            | 1.7      | 0.0029     |
| AMPK signaling pathway                               | 1.68     | 0.00000694 |
| HIF-1 signaling pathway                              | 1.67     | 0.0000382  |
| EGFR tyrosine kinase inhibitor resistance            | 1.65     | 0.00042    |
| Insulin signaling pathway                            | 1.63     | 0.00000694 |
| Insulin resistance                                   | 1.63     | 0.0000447  |
| ErbB signaling pathway                               | 1.62     | 0.00046    |
| Colorectal cancer                                    | 1.61     | 0.00046    |
| Longevity regulating pathway                         | 1.59     | 0.00047    |
| Autophagy - animal                                   | 1.57     | 0.0000698  |
| Endocrine resistance                                 | 1.56     | 0.00053    |
| Choline metabolism in cancer                         | 1.55     | 0.00055    |
| AGE-RAGE signaling pathway in diabetic complications | 1.55     | 0.00055    |

|                                     |      |         |
|-------------------------------------|------|---------|
| Central carbon metabolism in cancer | 1.55 | 0.0053  |
| Non-small cell lung cancer          | 1.54 | 0.0053  |
| Fc epsilon RI signaling pathway     | 1.54 | 0.0053  |
| Th17 cell differentiation           | 1.53 | 0.00056 |
| Glioma                              | 1.53 | 0.0053  |
| Renal cell carcinoma                | 1.53 | 0.0053  |
| Toxoplasmosis                       | 1.5  | 0.00065 |

| Reactome Pathway                                    | Strength | FDR     |
|-----------------------------------------------------|----------|---------|
| CD28 dependent PI3K/Akt signaling                   | 2.02     | 0.006   |
| mTORC1-mediated signalling                          | 2.02     | 0.006   |
| HSF1-dependent transactivation                      | 2        | 0.006   |
| mTOR signalling                                     | 1.95     | 0.00066 |
| Constitutive Signaling by AKT1 E17K in Cancer       | 1.95     | 0.006   |
| VEGFR2 mediated vascular permeability               | 1.93     | 0.006   |
| Energy dependent regulation of mTOR by<br>LKB1-AMPK | 1.9      | 0.006   |
| Regulation of TP53 Degradation                      | 1.82     | 0.006   |
| Intrinsic Pathway for Apoptosis                     | 1.73     | 0.0078  |
| Macroautophagy                                      | 1.72     | 0.0015  |
| Signaling by PTK6                                   | 1.65     | 0.0015  |
| TP53 Regulates Metabolic Genes                      | 1.62     | 0.0023  |
| Regulation of PTEN gene transcription               | 1.59     | 0.0119  |

| Combination vs BRAFi (Additive AXLi effect)    |          |        |
|------------------------------------------------|----------|--------|
| KEGG Pathways                                  | Strength | FDR    |
| Ferroptosis                                    | 2.04     | 0.0115 |
| p53 signaling pathway                          | 1.81     | 0.0115 |
| Longevity regulating pathway                   | 1.69     | 0.0133 |
| Thyroid hormone signaling pathway              | 1.58     | 0.0179 |
| Natural killer cell mediated cytotoxicity      | 1.54     | 0.0179 |
| Osteoclast differentiation                     | 1.54     | 0.0179 |
| Fluid shear stress and atherosclerosis         | 1.51     | 0.0179 |
| Apoptosis                                      | 1.51     | 0.0179 |
| Reactome Pathway                               | Strength | FDR    |
| Intrinsic Pathway for Apoptosis                | 2        | 0.0243 |
| Macroautophagy                                 | 1.82     | 0.0243 |
| TP53 Regulates Metabolic Genes                 | 1.72     | 0.0243 |
| PI3K/AKT Signaling in Cancer                   | 1.71     | 0.0243 |
| Protein folding                                | 1.65     | 0.0243 |
| Interleukin-4 and Interleukin-13 signaling     | 1.61     | 0.0243 |
| Cell surface interactions at the vascular wall | 1.51     | 0.0243 |

Melmet 1 tumors were treated with BRAFi: 12.5 mg/kg, AXLi 50 mg/kg, the combination or vehicle (DMSO/methylcellulose) for ten days, twice a day. Significantly modulated proteins between differently treated tumors were analyzed by RPPA analysis and further subjected to STRING database ([www.string-db.org](http://www.string-db.org)). Top identified functional enrichments within KEGG (Kanehisa M. *et al.*, Nucleic Acids Res., 2021) and Reactome signaling pathway databases were ranked based on strength (set to be above 1.5). Strength and False Discovery Rate (FDR) describe how large and significant, respectively, the enrichment effect is.
